1 **LRH: Espinosa-Guerra, et al**  
2 **RRH: Mental health outcomes during COVID-19**

3

4 **Prevalence and associated factors with mental health outcomes among interns and residents**  
5 **physicians during COVID-19 epidemic in Panama: a cross-sectional study**

6

7

8 Edward A. Espinosa-Guerra<sup>1,2</sup>, Edgar R. Rodríguez-Barría<sup>3</sup>, Christl A. Donnelly<sup>4,5</sup>, Jean-Paul  
9 Carrera<sup>6,7\*</sup>

10

11 1 Public Health and Preventive Medicine, Residency Program, Complejo Hospitalario Dr. Arnulfo  
12 Arias Madrid, Panama City, Panama

13 2 School of Public Health, University of Panama, Panama City, Panama

14 3 Department of Psychiatry, Residency Program, Complejo Hospitalario Dr. Arnulfo Arias Madrid,  
15 Panama City, Panama

16 4. Department of Infectious Disease Epidemiology, MRC, Centre for Global Infectious Disease  
17 Analysis (MRC-GIDA), Imperial College London, London, United Kingdom

18 5. Department of Statistics, University of Oxford, Oxford, United Kingdom

19 6 Department of Zoology, University of Oxford, Oxford, United Kingdom

20 7. Department of Virology and Biotechnology, Gorgas Memorial Institute of Health Studies,  
21 Panama City, Panama

22

23 \*Address correspondent to: [jean.carrera@zoo.ox.ac.uk](mailto:jean.carrera@zoo.ox.ac.uk) or [jpcarrera@gorgas.gob.pa](mailto:jpcarrera@gorgas.gob.pa) (J-PC)

24

25

26

27

28

29

30

31

32

33

34

35

36

37

38

39

40

41

42

43

44

45

46

47

## 1 Abstract

2 **Background.** A new coronavirus SARS-CoV-2 was associated with a newly identified respiratory  
3 syndrome, COVID-19 in Wuhan, China, in early December 2019. SARS-CoV-2 rapidly spread across  
4 the globe resulting in 117 million cases and 2.59 million deaths by March 2021. Rapidly increased  
5 numbers of COVID-19 cases overwhelmed public health systems across the world, imposing  
6 increased working hours and workloads for health care workers. Here, we have evaluated the  
7 prevalence of health outcomes and associated factors of interns and resident physicians in  
8 Panama.

9 **Methods.** A cross-sectional study was undertaken during July 23, 2020, to August 13, 2020, to  
10 evaluate the prevalence of health outcomes and associated factors in interns and residents across  
11 Panama. Snowball sampling was used to recruit participants. Then an electronic questionnaire  
12 with scales to evaluate anxiety disorders (GAD-7), depression (PHQ-9) and post-traumatic stress  
13 (IES-R) was evaluated. In addition, socio-demographic variables, clinical history of mental disorders  
14 and COVID-19 exposure were evaluated. Independent analyses for each mental health outcome  
15 were undertaken using a logistic regression analysis.

16 **Results.** A total of 517/1205 (42.9%) interns and residents were nationwide recruited. Of these  
17 274 (53.0%) were interns and 243 (47.0%) residents. The overall prevalence of depression  
18 symptoms was 25.3%, 13.7% anxiety and 12.2% post-traumatic stress. At least, 9.3% participants  
19 reported having suicidal ideation.

20 The most parsimonious model showed females had a higher prevalence of mental health  
21 disorders, in all results and the married participants were more likely to present depression (OR,  
22 1.73; 95% CI, 1.03-2.91; P = 0.039) or at least one alteration to mental health (OR, 1.66; 95% CI,  
23 1.03-2.68; P = 0.039). Resident physicians in surgical specialties were less likely to have post-  
24 traumatic stress (OR, 0.20; 95% CI, 0.06-0.63; P = 0.006) or at least one mental health disturbance  
25 (OR, 0.46; 95% CI, 0.26-0.83; P = 0.010). A history of psychological trauma and psychiatric  
26 pathology were risk factors for most of the disorders investigated.

27 **Conclusions.** A high prevalence of mental health disorders was found, showing the need to  
28 mitigate this emotional burden among healthcare workers in the current context of the COVID-19  
29 pandemic.

30

## 31 Background

32 The global health emergency caused by the coronavirus disease (COVID-19) that emerged in the  
33 city of Wuhan, capital of Hubei province in China, in late 2019 has posed one of the greatest  
34 challenges to frontline health care workers<sup>1</sup>. In Panama, COVID19 was detected on early March,  
35 2020, although the country rapidly implemented control and mitigation strategies, Panama has  
36 one of the highest cumulative case incidences in the Americas<sup>2</sup>. By July 7<sup>th</sup>, 2020, COVID-19  
37 seroprevalence in Panama was estimated around 11.7% in health care worker<sup>3</sup>.

38

39 As countries have adopted draconian social distancing measures to reduce infections, there has  
40 been an increase in stressors that will likely increase the risk of psychiatric illness associated with

1 COVID-19 controls in the coming months <sup>4</sup>. In health care workers, the workload, the scarcity of  
2 personal protective equipment and the fear of contagion to family and friends are added to the  
3 risk for those who are in the front line of patient care, potentially triggering anxiety, fatigue,  
4 depression, irritability, fear, insomnia, etc. However, despite the efforts to comply with the  
5 provisions of governments to control the epidemic; it has been seen in studies related to severe  
6 acute respiratory syndrome (SARS) in 2003, that although affected people and health workers  
7 were motivated to comply with quarantine to reduce the risk of infecting others, emotional  
8 distress tempted some to consider violating disease control measures <sup>5</sup>.

9 It is evident that the pandemic has led to an increase in the prevalence of mental health disorders  
10 in the world's population <sup>6</sup>. Health care workers do not escape from this reality, so it is necessary  
11 to know the factors that influence these findings, evaluating the association or not of this outcome  
12 to mental health in order to make a comprehensive approach to support those who are in the first  
13 line of care.

14 Intern physicians carry out visits, prepare clinical histories, evaluate the daily evolutions of the  
15 clinical condition of patients, attend teaching meetings, among other responsibilities, under the  
16 supervision of a medical officer. While the responsibilities of resident physicians are established  
17 according to each medical residency program in their training hospital, but in general, they admit  
18 patients, undertake rotations in different medical specialties, conduct daily patient evaluations,  
19 among other responsibilities.

20 In Panama, the internship and medical residency are carried out in public hospitals nationwide and  
21 affiliated with the Federación Nacional de Médicos Residentes e Internos (FENAMERI). Being in the  
22 front line of care, these physicians spend long working hours in hospitals and care centers,  
23 performing shifts on both weekdays and weekends. This poses a greater risk of infection due to  
24 the high workloads as the public health system reaches maximum capacity and added to the  
25 shortage of personal protective equipment, potentially being a trigger for poor mental health.

## 26 27 **Ethical approval**

28 The National Research Bioethics Committee of Panama approved the study protocol by resolution  
29 EC-CNBI-2020-06-74. Participants provided online informed consent prior to completing the  
30 questionnaire.

## 31 32 **Methods**

33 This cross-sectional study was conducted during the COVID-19 pandemic based on a survey of  
34 resident physicians and interns working in public health facilities in Panama (potential respondents  
35 were 408 resident physicians and 797 interns) in July 2020 and affiliated with the National  
36 Federation of Resident Physicians and Interns (FENAMERI). The objective of the study was to  
37 determine the prevalence of mental health disorders and identify their associated factors related  
38 to sociodemographic characteristics, personal history, and exposure to SARS-CoV-2.

39 Between July 23 and August 13, a link containing an anonymous self-report questionnaire was  
40 sent, disseminated through emails and WhatsApp using a snowball technique. Approval for this  
41 study was obtained from the National Committee on Research Bioethics (CNBI) and participants'

1 informed consent was obtained online. The sampling period corresponded to the period of high  
2 incidence of COVID-19 infection, in accordance with high hospital occupancy at the national level.  
3 The questionnaire collected data on sociodemographic variables (sex, age, marital status,  
4 occupation), personal history (smoking, harmful use of alcohol assessed by the AUDIT-C scale <sup>7</sup>,  
5 history of psychological trauma, history of psychiatric illness, family history of psychiatric illness)  
6 and exposure information (history of COVID-19 diagnosis, family member with COVID-19  
7 diagnosis, infected colleagues, and whether he/she attended patients with COVID-19 in the last 15  
8 days).

9 Mental health outcomes were symptoms of depression, generalized anxiety, and post-traumatic  
10 stress, assessed by self-report using the 9-item Patient Health Questionnaire (PHQ-9) scales <sup>8</sup>, the  
11 7-item Generalized Anxiety Disorder scale (GAD-7) <sup>9</sup>, and the 22-item Impact of Events Scale (IES-  
12 R) <sup>10</sup>.

13 Study participants were classified according to the presence or absence of these symptoms with  
14 the following cutoff points: at least 10 on the PHQ-9 questionnaire, at least 10 on the GAD-7, and  
15 at least 26 on the IES-R. Those who scored higher were considered as having a clinically significant  
16 range of mental health impairment. The cut-off points were extracted from the original articles  
17 describing each measure <sup>8-10</sup>.

18 In order to protect the confidentiality of the participants, the data on the type of specialty are  
19 grouped into: surgical specialties (general surgery, cardiovascular surgery, ophthalmology,  
20 otorhinolaryngology, maxillofacial surgery, neurosurgery, vascular surgery, orthopedics, etc.),  
21 medical specialties (internal medicine and its subspecialties, psychiatry, physical medicine and  
22 rehabilitation, pediatrics and its subspecialties, occupational medicine, anesthesiology, preventive  
23 medicine, etc.), and diagnostic support specialties (pathology, radiology, etc.).

24 For the analysis of the results, frequencies and percentages were calculated for sociodemographic  
25 data, personal and family history, exposure to COVID-19 and prevalence of each mental health  
26 finding; then univariable and multivariable logistic regression models were performed to explore  
27 the association of these results.

28

## 29 **Statistical analysis**

30 Independents analyses were undertaken for each mental health impairments: depression (PHQ-9  
31  $\geq 10$ ), generalized anxiety (GAD-7  $\geq 10$ ), post-traumatic stress (IES-R  $\geq 26$ ), presence of at least  
32 one impairment and presence of all three impairments. In each case, the outcome variable was  
33 the presence/absence of mental health disturbances, as determined by the cutoff point.  
34 Associations between each outcome and the study variables were tested using chi-square test and  
35 Fisher's exact tests;  $P < 0.05$  was considered significant. Associations between each outcome and  
36 the independent variables were estimated using generalized estimating equations for logistic  
37 regression models and expressed as odds ratios (OR). Interaction variables between all variables  
38 identified as significant in the univariate analysis were examined, and marginal effects of  
39 significant interaction terms were determined. Model diagnostics were performed to check for  
40 model specification errors, Multicollinearity was also explored. The most parsimonious model was  
41 obtained with variable selection of the log likelihood test <sup>11</sup>. Univariable and multivariable ORs

1 were calculated with 95% CIs. Analyses were performed in Stata/SE version 16.1 (StataCorp,  
2 College Station, TX).

3  
4  
5

## 6 **Results**

7 The demographics of the participants are shown in Table 1. A total of 517 physicians completed  
8 the online questionnaire, of whom 243 (47%) were resident physicians and 274 (53%) were  
9 interns, for a response rate of 42.9% (517/1205). Of the participants, 48.5% were concentrated in  
10 the province of Panama, the capital of the country. Their mean age was 28 years (SD 3.1), with a  
11 majority of respondents being female (61.5%). Seventy-eight-point nine percent were single or  
12 separated. Of the respondents, 14.9% reported having been laboratory confirmed with COVID-19.

13

### 14 **Prevalence of mental health disturbances**

15 The prevalence rate of mental health disorders was: 25.3% (131/517) for depressive symptoms,  
16 13.7% (71/517) for generalized anxiety, and 12.2% (63/517) for post-traumatic stress disorder. Of  
17 the respondents, 32.7% (169/517) presented at least one disturbance and 5.8% (30/517)  
18 presented all three mental health disturbances.

19 In response to item 9 of the PHQ-9 questionnaire "How often do you think you would be better off  
20 dead or would hurt yourself in some way?" 9.3% (48/517) of respondents reported having suicidal  
21 thoughts; 0.8% (4/517) reported having suicidal ideation "more than half the days" and 8.5%  
22 (44/517) reported experiencing it "several days."

23

### 24 **Logistic regression models**

#### 25 **Univariable analysis**

26 Female sex and personal history of psychological trauma and psychiatric pathology were  
27 associated with all three mental health outcomes investigated (Table 3). For example, depression  
28 among women: OR=1.75; 95% CI, 1.14-2.69; P = 0.010; generalized anxiety OR=3.19; 95% CI, 1.70-  
29 5.99; P <0.001; post-traumatic stress OR=2.98; 95% CI, 1.54-5.74; P = 0.001; with at least one  
30 mental health disturbance OR=1.93; 95% CI, 1.30-2.87; P = 0.001; and with all three mental health  
31 disturbances OR=4.34; 95% CI, 1.49-12.63; P = 0.007.

32 Being a resident physician in surgical specialties was significantly associated with a reduced risk of  
33 post-traumatic stress (OR, 0.23; 95% CI, 0.08-0.65; P = 0.006) and of developing at least 1 mental  
34 health disorder (OR, 0.45; 95% CI, 0.26-0.78; P = 0.005).

35 Smoking was significantly associated with post-traumatic stress, having at least 1 disorder, and  
36 having all three mental health disorders (Table 3). On the other hand, having a history of having  
37 been diagnosed with COVID-19 increased the risk of presenting depression, post-traumatic stress  
38 and all three mental health disorders; while having a history of having a family member diagnosed  
39 with COVID-19 was significantly associated with post-traumatic stress (Table 3).

40 Respondents who presented depression and generalized anxiety found these symptoms made it  
41 difficult to perform their work (Table 3 and 4).

42

## 1 **Multivariable analysis**

2 The most parsimonious multivariable model revealed that female sex was positively associated  
3 with the prevalence of mental health disturbances in all the outcomes analyzed (Table 4). Married  
4 participants were more likely to have depression (OR, 1.73; 95% CI, 1.03-2.91; P = 0.039) or at least  
5 one mental health disturbance (OR, 1.66; 95% CI, 1.03-2.68; P = 0.039).  
6 Surgical specialties were less likely to have PTSD or at least one mental health disturbance, while  
7 smoking was significantly associated with self-report of these disturbances (Table 4).  
8 Having a previous diagnosis of COVID-19 was associated with having all three mental health  
9 disorders and having a family member with COVID-19 was significantly associated with post-  
10 traumatic stress.

11

## 12 **Discussion**

13 Our findings document a high prevalence of symptoms associated with mental health disorders  
14 during the first peak of COVID-19 cases in Panama. We found prevalence rates of 25.3% for  
15 depression, 13.7% for anxiety, and 12.2% for post-traumatic stress disorder, comparatively similar  
16 to those found in health personnel in Dutch<sup>12</sup> and Italian<sup>13</sup> but below those found during this  
17 outbreak in China<sup>14</sup>.

18 In high-incidence areas, an epidemic event of this magnitude is comparable to previous events  
19 such as SARS, where a large percentage of health care workers in high-risk situations reported  
20 symptoms related to mental health disturbances<sup>15</sup>.

21 Female respondents were 1.74 to 4.34 times more likely to report a mental health disturbance  
22 compared to males, consistent with a systematic review by Ricci et al. where women were more  
23 likely than men to report mental health disturbances, especially for schizotypal personality  
24 disorder (STPD)<sup>16</sup>. The history of psychological trauma in females as a risk factor for the  
25 development of mental health disorders may be attributed to gender differences in the rates and  
26 types of trauma exposure (e.g., natural disasters, motor vehicle accidents, rape, physical attack,  
27 combat, etc.)<sup>17</sup>.

28

29 Most participants were medical interns, indicating that most of them had fewer years of work  
30 experience and are probably exposed to a higher risk of infection. This study indicated that having  
31 a history of psychological trauma and psychiatric pathology was associated with experiencing  
32 depression, generalized anxiety and post-traumatic stress disorder outcomes, in all models  
33 conducted. This is consistent with the findings of Young et al. where healthcare workers with a  
34 history of mental illness were at increased risk for significant emotional symptoms<sup>18</sup>.

35 Being married was associated with depressive symptoms, which may be due to competing family  
36 responsibilities and/or fear of partner contagion. This pattern was also observed during the SARS  
37 epidemics in 2003 in China<sup>19</sup> and Canada<sup>20</sup>. On the other hand, the occupation of resident  
38 physician in surgical specialties reduced the risk of post-traumatic stress and of developing at least  
39 1 mental health disorders. Elective surgeries were suspended in all hospitals in the country, as a  
40 preventive measure adopted by the Ministry of Health, to limit transmission risks in hospital  
41 settings<sup>21</sup>.

1 As previous studies indicate, smoking is an important mental health issue, and in this study,  
2 smokers were 2-5 times more at risk for post-traumatic stress disorder and 2 times more at risk for  
3 at least 1 mental health disturbance than non-smokers<sup>22</sup>. These findings could be due to in part to  
4 the pandemic generating factors that contribute to smoking initiation or the vulnerability of  
5 people with a significant psychological history has triggered the habit of smoking<sup>6</sup>.

6 A troubling finding immersed in the depression data is the rate of individuals reporting positive  
7 responses to item 9 of the PHQ-9 questionnaire ("How often do you think you would be better off  
8 dead or hurt in some way?"). Of the respondents, 9.3% reported having suicidal thoughts, within  
9 them; 0.8% reported having suicidal ideation half of the days and 8.5% reported experiencing it  
10 almost every day. This result indicated elevated suicidal ideation above that found in U.S. health  
11 care workers by Young et al.<sup>18</sup> and close to that reported by the CDC, with 10.7% of persons  
12 experiencing suicidal thoughts associated with the COVID-19 pandemic<sup>23</sup>.

13 In a study to determine whether responses to the PHQ-9 questionnaire predict subsequent suicide  
14 attempt or death by suicide, Simon et al. found that those individuals with positive responses to  
15 item 9 of the PHQ-9 were six times more likely to attempt suicide and five times more likely to die  
16 by suicide within one year than those who did not report such thoughts<sup>24</sup>. Another study by  
17 Rossom et al. demonstrated that patients with any level of suicidal ideation on item 9 of the PHQ-  
18 9 were almost twice as likely to attempt suicide in the following year<sup>25</sup>.

19 Additionally, our findings indicate that exposure to COVID-19 at work or at home through the  
20 illness of a family member with COVID-19 independently contributed to presenting with all three  
21 mental health disturbances together and post-traumatic stress, respectively. Similar results were  
22 evident during the SARS epidemic in 2003 where having had a family member or friend with SARS  
23 was a strong predictor of the level of post-traumatic stress symptoms, suggesting a special feature  
24 of the psychosocial effects of infectious disease outbreaks, which can be differentiated from other  
25 disasters<sup>19</sup>.

26 Previous studies have shown that young physicians are a vulnerable professional group requiring  
27 professional support to prevent mental health disorders due to long working hours, and support  
28 from senior physicians may have a positive effect on some of these disorders, especially in health  
29 emergencies<sup>26</sup>.

30 Despite a response rate of 42.9%, non-response bias may exist because the remaining resident  
31 physicians and interns might have shown less interest in participating because they were not as  
32 emotionally affected by the current pandemic. Therefore, it is difficult to estimate how  
33 representative the responses are of the population of residents and interns or how biased the  
34 estimates might be due to nonresponse. On the other hand, we assume that the reliability of the  
35 responses is high because the data collected in the survey are familiar to residents and interns and  
36 they are able to recognize the mental illnesses studied here. With the aim of assessing mental  
37 disturbances at the time of response, the questions in the questionnaire focused on symptoms  
38 during the last 15 days.

39

40 **Conclusions**

1 With a response rate of 42.9%, one third of our sample presented at least one clinically significant  
2 mental health disturbance (including suicidal ideation), with women being the most affected in all  
3 analyses.

4 Our findings raise concerns about the psychological well-being of resident physicians and interns  
5 involved in care during the first wave of the COVID-19 epidemic in Panama.

6 It is essential for institutions to intervene with those most at risk of presenting psychiatric  
7 symptoms and offer them sources of support to mitigate the emotional impact and increase  
8 resilience in situations of occupational stress.

9

10

## 11 **List of abbreviations**

12 SARS-CoV-2: severe acute respiratory syndrome type 2 coronavirus; COVID-19: coronavirus  
13 disease 2019; PHQ-9: Patient Health Questionnaire; GAD-7: General Anxiety Disorder-7; IES-R:  
14 Impact of Event Scale- Revised; PTSD: Post-traumatic stress disorder; COVID-19: Coronavirus  
15 Disease 2019; FENAMERI: Federación Nacional de Médicos Residentes e Internos; CDC: Center for  
16 Disease Control and Prevention.

17

## 18 **Statements**

### 19 **Ethical approval and consent to participate.**

20 The National Research Bioethics Committee of Panama approved the study protocol by resolution  
21 EC-CNBI-2020-06-74. Participants provided online informed consent prior to completing the  
22 questionnaire.

23

### 24 **Data and material availability**

25 The data set generated and analyzed in the current study is available from the corresponding  
26 author upon reasonable request.

27

### 28 **Conflict of interests**

29 The authors declare that they have no conflicts of interest.

30

### 31 **Funds**

32 This work was supported by SENACYT (grant of rapid response to COVID-19 pandemic: FID-03-  
33 2021-COVID19-08) grant to J-PC. J-PC is funded by the Clarendon Scholarship from the University  
34 of Oxford and Lincoln-Kingsgate Scholarship from Lincoln College-Oxford. “This work was jointly  
35 funded by the UK Medical Research Council (MRC) and the UK Department for International  
36 Development (DFID) under the MRC/DFID Concordat agreement and is also part of the EDCTP2  
37 programme supported by the European Union (MR/R015600/1). CAD thanks the UK NIHR for  
38 funding of the NIHR Health Protection Research Unit in Emerging and Zoonotic Infections.” EB is  
39 member of the Sistema Nacional de Investigación (SNI-SENACYT), Panamá.

40

41

### 42 **Author's contributions**



1 EE conceived and designed the study. EE and EB constructed the questionnaire. EE and EB  
2 collected the data. EE and J-PC performed the statistical analysis and CD advised on statistical  
3 analysis. EE, EB and J-PC wrote the manuscript. EE, EB, CD, J-PC supervised the project and  
4 contributed to the writing of the paper. All authors reviewed the manuscript. All authors read and  
5 approved the final manuscript.  
6

## 7 **Acknowledgements**

8 The authors would like to thank all the residents and interns physicians in Panama for their  
9 contribution to patient care during this health crisis and their participation in this study.

## 10 **Authors' information**

11 1 Public Health and Preventive Medicine, Residency Program, Complejo Hospitalario Dr. Arnulfo  
12 Arias Madrid, Panama City, Panama  
13 2 School of Public Health, University of Panama, Panama City, Panama  
14 3 Department of Psychiatry, Residency Program, Complejo Hospitalario Dr. Arnulfo Arias Madrid,  
15 Panama City, Panama.  
16 4. Department of Infectious Disease Epidemiology, MRC, Centre for Global Infectious Disease  
17 Analysis (MRC-GIDA), Imperial College London, London, United Kingdom  
18 5. Department of Statistics, University of Oxford, Oxford, United Kingdom  
19 6 Department of Zoology, University of Oxford, Oxford, United Kingdom  
20 7. Department of Virology and Biotechnology, Gorgas Memorial Institute of Health Studies,  
21 Panama City, Panama  
22  
23

## 24 **References**

- 25 1. Li, Q. *et al.* Early Transmission Dynamics in Wuhan, China, of Novel Coronavirus–Infected  
26 Pneumonia. *N. Engl. J. Med.* **382**, 1199–1207 (2020).
- 27 2. Franco, D. *et al.* Early transmission dynamics, spread, and genomic characterization of  
28 SARS-CoV-2 in Panama. *Emerg. Infect. Dis.* **27**, (2021).
- 29 3. Villarreal, A. *et al.* Performance of a point of care test for detecting IgM and IgG antibodies  
30 against SARS-CoV-2 and seroprevalence in blood donors and health care workers in  
31 Panama. *medRxiv* (2020) doi:10.1101/2020.09.25.20201459.
- 32 4. Pfefferbaum, B. & North, C. S. Mental Health and the Covid-19 Pandemic. *N. Engl. J. Med.*  
33 **383**, 510–512 (2020).
- 34 5. DiGiovanni, C., Conley, J., Chiu, D. & Zaborski, J. Factors influencing compliance with  
35 quarantine in Toronto during the 2003 SARS outbreak. *Biosecur. Bioterror.* **2**, 265–272  
36 (2004).
- 37 6. Ganhao, M., Trigo, M. & Paixao, A. P.619 Tobacco in times of COVID-19: reflecting on risks  
38 for patients with mental health illness. *Eur. Neuropsychopharmacol.* **40**, S351–S352 (2020).
- 39 7. Alcohol Use Disorders Identification Test (AUDIT-C) - Viral Hepatitis and Liver Disease.
- 40 8. Spitzer, R. L., Kroenke, K. & Williams, J. B. W. Validation and utility of a self-report version  
41 of PRIME-MD. *Prim. Care Companion J. Clin. Psychiatry* **2**, 31 (2000).
- 42 9. Spitzer RL, Kroenke K, Williams JW & Löwe B. A brief measure for assessing generalized  
43 anxiety disorder: The GAD-7. *Arch. Intern. Med.* **166**, 1092–1097 (2006).
- 44 10. Weiss, D. S. The Impact of Event Scale: Revised. *Cross-Cultural Assess. Psychol. Trauma*  
45 *PTSD* 219–238 (2007) doi:10.1007/978-0-387-70990-1\_10.
- 46 11. Vuong, Q. H. Likelihood Ratio Tests for Model Selection and Non-Nested Hypotheses.

- 1 *Econometrica* **57**, 307 (1989).
- 2 12. Ruitenburg, M. M., Frings-Dresen, M. H. & Sluiter, J. K. The prevalence of common mental  
3 disorders among hospital physicians and their association with self-reported work ability: A  
4 cross-sectional study. *BMC Health Serv. Res.* **12**, (2012).
- 5 13. Rossi, R. *et al.* Mental Health Outcomes Among Frontline and Second-Line Health Care  
6 Workers During the Coronavirus Disease 2019 (COVID-19) Pandemic in Italy. *JAMA Netw.*  
7 *open* **3**, e2010185 (2020).
- 8 14. Lai, J. *et al.* Factors Associated With Mental Health Outcomes Among Health Care Workers  
9 Exposed to Coronavirus Disease 2019. *JAMA Netw. open* **3**, e203976 (2020).
- 10 15. Chua, S. E. *et al.* Psychological effects of the SARS outbreak in Hong Kong on high-risk  
11 health care workers. *Can. J. Psychiatry* **49**, 391–393 (2004).
- 12 16. Serrano-Ripoll, M. J. *et al.* Impact of viral epidemic outbreaks on mental health of  
13 healthcare workers: a rapid systematic review and meta-analysis. *Journal of Affective*  
14 *Disorders* vol. 277 (2020).
- 15 17. Stein, M. B., Walker, J. R. & Forde, D. R. Gender differences in susceptibility to  
16 posttraumatic stress disorder. *Behav. Res. Ther.* **38**, 619–628 (2000).
- 17 18. Young, K. P. *et al.* Health Care Workers' Mental Health and Quality of Life During COVID-19:  
18 Results From a Mid-Pandemic, National Survey. *Psychiatr. Serv.* appips202000424 (2020)  
19 doi:10.1176/appi.ps.202000424.
- 20 19. Jones, R. The Psychological Impact of the SARS Epidemic on Hospital Employees in China:  
21 Exposure, Risk Perception, and Altruistic Acceptance of Risk. *Bone* **23**, 1–7 (2014).
- 22 20. Nickell, L. A. *et al.* Psychosocial effects of SARS on hospital staff: Survey of a large tertiary  
23 care institution. *Cmaj* **170**, 793–798 (2004).
- 24 21. Ministerio de Salud. Suspensión de visitas, consulta externa y cirugías en todos los  
25 hospitales de Panamá. [https://www.pacificasalud.com/notice/es/cierre\\_consultas\\_covid19](https://www.pacificasalud.com/notice/es/cierre_consultas_covid19)  
26 (2020).
- 27 22. Fu, S. S. *et al.* Post-traumatic stress disorder and smoking: A systematic review. *Nicotine*  
28 *and Tobacco Research* vol. 9 (2007).
- 29 23. Czeisler, M. É. *et al.* Mental Health, Substance Use, and Suicidal Ideation During the COVID-  
30 19 Pandemic — United States, June 24–30, 2020. *MMWR. Morb. Mortal. Wkly. Rep.* **69**,  
31 1049–1057 (2020).
- 32 24. Simon, G. E. *et al.* Does response on the PHQ-9 depression questionnaire predict  
33 subsequent suicide attempt or suicide death? *Psychiatr. Serv.* **64**, 1195–1202 (2013).
- 34 25. Rossom, R. C. *et al.* Suicidal ideation reported on the PHQ9 and risk of suicidal behavior  
35 across age groups. *Journal of Affective Disorders* vol. 215 77–84 (2017).
- 36 26. Petrie, K. *et al.* Working hours, common mental disorder and suicidal ideation among junior  
37 doctors in Australia: A cross-sectional survey. *BMJ Open* **10**, 1–7 (2020).

38

39

40

41

42

43

1  
2  
3  
4  
5  
6  
7

Table 1. Demographic characteristics of the study population.

| Characteristics                           | No. (%)    |
|-------------------------------------------|------------|
| Total                                     | 517 (100)  |
| Gender                                    |            |
| Male                                      | 199 (38.5) |
| Female                                    | 318 (61.5) |
| Age (mean $\pm$ SD)                       | 27.9 (3.1) |
| Marital status                            |            |
| Unmarried or divorced                     | 408 (78.9) |
| Married                                   | 109 (21.1) |
| Provinces                                 |            |
| Bocas del Toro                            | 11 (2.1)   |
| Chiriquí                                  | 41 (7.9)   |
| Coclé                                     | 13 (2.5)   |
| Colón                                     | 12 (2.3)   |
| Darién                                    | 3 (0.6)    |
| Herrera                                   | 8 (1.5)    |
| Los Santos                                | 4 (0.8)    |
| Panamá                                    | 251 (48.5) |
| Panamá Oeste                              | 5 (1.0)    |
| Veraguas                                  | 6 (1.2)    |
| Unanswered                                | 163 (31.5) |
| Main occupation                           |            |
| Intern physician                          | 274 (53)   |
| Medical specialties (resident)            | 131 (25.3) |
| Surgical specialties (resident)           | 94 (18.2)  |
| Diagnostic support specialties (resident) | 18 (3.5)   |
| Background information                    |            |
| Smoking                                   |            |
| Yes                                       | 46 (8.9)   |
| No                                        | 471 (91.1) |
| Alcohol misuse                            |            |
| Yes                                       | 209 (40.4) |
| No                                        | 308 (59.6) |
| Psychological trauma                      |            |
| Yes                                       | 67 (13)    |
| No                                        | 450 (87)   |

|                                         |  |            |
|-----------------------------------------|--|------------|
| Psychiatric pathology                   |  |            |
| Yes                                     |  | 88 (17)    |
| No                                      |  | 429 (83)   |
| Psychiatric pathology in family members |  |            |
| Yes                                     |  | 189 (36.6) |
| No                                      |  | 328 (63.4) |
| Exposure to COVID-19                    |  |            |
| Been diagnosed with COVID-19            |  |            |
| Yes                                     |  | 77 (14.9)  |
| No                                      |  | 440 (85.1) |
| Diagnosis of COVID-19 in family members |  |            |
| Yes                                     |  | 138 (26.7) |
| No                                      |  | 379 (73.3) |
| Diagnosis of COVID-19 in colleague      |  |            |
| Yes                                     |  | 476 (92.1) |
| No                                      |  | 41 (7.9)   |
| Attending COVID-19 patients             |  |            |
| Yes                                     |  | 371 (71.8) |
| No                                      |  | 146 (28.2) |
| Mental health disturbances              |  |            |
| Depression <sup>1</sup>                 |  | 131 (25.3) |
| Generalized anxiety <sup>2</sup>        |  | 71 (13.7)  |
| Posttraumatic stress <sup>3</sup>       |  | 63 (12.2)  |
| Suicidal ideation <sup>4</sup>          |  | 48 (9.3)   |

---

\*SD Standard Deviation

<sup>1</sup>At least 10 points on the PHQ-9 questionnaire

<sup>2</sup>At least 10 points on the GAD-7 questionnaire

<sup>3</sup>At least 33 points on the IES-R questionnaire

<sup>4</sup>In response to item 9 of the PHQ-9 questionnaire

1  
2  
3  
4  
5  
6  
7  
8  
9

1

2

3

4

Table 2. Independent factors associated with mental health outcomes in univariate generalized estimating equations for logistic regression models (n = 517)

| Factor                                    | Depression <sup>1</sup> |                    |                  | Generalized anxiety <sup>2</sup> |                    |                  | Post-traumatic stress <sup>3</sup> |                    |                  | At least one outcome |                    |                  | Presence of all three outcomes |                     |                  |
|-------------------------------------------|-------------------------|--------------------|------------------|----------------------------------|--------------------|------------------|------------------------------------|--------------------|------------------|----------------------|--------------------|------------------|--------------------------------|---------------------|------------------|
|                                           | OR                      | CI 95%             | p                | OR                               | CI 95%             | p                | OR                                 | CI 95%             | p                | OR                   | CI 95%             | p                | OR                             | CI 95%              | p                |
| <b>Gender</b>                             |                         |                    |                  |                                  |                    |                  |                                    |                    |                  |                      |                    |                  |                                |                     |                  |
| Male                                      | Ref.                    | -                  | -                | Ref.                             | -                  | -                | Ref.                               | -                  | -                | Ref.                 | -                  | -                | Ref.                           | -                   | -                |
| Female                                    | <b>1.75</b>             | <b>(1.14-2.69)</b> | <b>0.10</b>      | <b>3.19</b>                      | <b>(1.70-5.99)</b> | <b>&lt;0.001</b> | <b>2.98</b>                        | <b>(1.54-5.74)</b> | <b>0.001</b>     | <b>1.93</b>          | <b>(1.30-2.87)</b> | <b>0.001</b>     | <b>4.34</b>                    | <b>(1.49-12.63)</b> | <b>0.007</b>     |
| Age                                       | 0.99                    | (0.92-1.05)        | 0.703            | 1.00                             | (0.93-1.09)        | 0.909            | 0.91                               | (0.82-1.00)        | 0.059            | 0.95                 | (0.89-1.01)        | 0.126            | 0.99                           | (0.89-1.12)         | 0.988            |
| <b>Marital status</b>                     |                         |                    |                  |                                  |                    |                  |                                    |                    |                  |                      |                    |                  |                                |                     |                  |
| Unmarried or divorce                      | Ref.                    | -                  | -                | Ref.                             | -                  | -                | Ref.                               | -                  | -                | Ref.                 | -                  | -                | Ref.                           | -                   | -                |
| Married                                   | 1.37                    | (0.86-2.19)        | 0.183            | 1.00                             | (0.54-1.85)        | 0.992            | 0.77                               | (0.39-1.53)        | 0.453            | 1.32                 | (0.85-2.05)        | 0.218            | 0.93                           | (0.37-2.34)         | 0.881            |
| <b>Main occupation</b>                    |                         |                    |                  |                                  |                    |                  |                                    |                    |                  |                      |                    |                  |                                |                     |                  |
| Intern physician                          | Ref.                    | -                  | -                | Ref.                             | -                  | -                | Ref.                               | -                  | -                | Ref.                 | -                  | -                | Ref.                           | -                   | -                |
| Medical specialties (resident)            | 0.73                    | (0.45-1.19)        | 0.209            | 0.59                             | (0.31-1.12)        | 0.109            | 0.56                               | (0.29-1.08)        | 0.084            | 0.65                 | (0.41-1.01)        | 0.058            | 0.76                           | (0.31-1.85)         | 0.542            |
| Surgical specialties (resident)           | 0.62                    | (0.35-1.10)        | 0.105            | 0.52                             | (0.25-1.12)        | 0.095            | <b>0.23</b>                        | <b>(0.08-0.65)</b> | <b>0.006</b>     | <b>0.45</b>          | <b>(0.26-0.78)</b> | <b>0.005</b>     | 0.44                           | (0.13-1.53)         | 0.198            |
| Diagnostic support specialties (resident) | 0.49                    | (0.13-1.75)        | 0.275            | 0.62                             | (0.14-2.79)        | 0.533            | 0.30                               | (0.04-2.31)        | 0.247            | 0.45                 | (0.14-1.41)        | 0.172            | 0.79                           | (0.10-6.26)         | 0.823            |
| <b>Background information</b>             |                         |                    |                  |                                  |                    |                  |                                    |                    |                  |                      |                    |                  |                                |                     |                  |
| Smoking                                   | 1.65                    | (0.87-3.14)        | 0.126            | 1.87                             | (0.88-3.95)        | 0.103            | <b>3.77</b>                        | <b>(1.88-7.54)</b> | <b>&lt;0.001</b> | <b>2.02</b>          | <b>(1.10-3.72)</b> | <b>0.024</b>     | <b>2.79</b>                    | <b>(1.08-7.23)</b>  | <b>0.034</b>     |
| Alcohol misuse                            | 1.46                    | (0.98-2.18)        | 0.063            | 0.95                             | (0.57-1.59)        | 0.855            | 1.21                               | (0.71-2.05)        | 0.488            | 1.10                 | (0.76-1.60)        | 0.609            | 1.51                           | (0.72-3.16)         | 0.274            |
| Psychological trauma                      | <b>2.42</b>             | <b>(1.42-4.12)</b> | <b>0.001</b>     | <b>4.00</b>                      | <b>(2.21-7.22)</b> | <b>&lt;0.001</b> | <b>2.69</b>                        | <b>(1.42-5.09)</b> | <b>0.002</b>     | <b>2.40</b>          | <b>(1.43-4.04)</b> | <b>0.001</b>     | <b>5.23</b>                    | <b>(2.39-11.45)</b> | <b>&lt;0.001</b> |
| Psychiatric pathology                     | <b>2.43</b>             | <b>(1.50-3.94)</b> | <b>&lt;0.001</b> | <b>5.29</b>                      | <b>(3.07-9.12)</b> | <b>&lt;0.001</b> | <b>2.64</b>                        | <b>(1.46-4.76)</b> | <b>0.001</b>     | <b>2.88</b>          | <b>(1.80-4.61)</b> | <b>&lt;0.001</b> | <b>4.20</b>                    | <b>(1.96-9.01)</b>  | <b>&lt;0.001</b> |
| Psychiatric pathology in family members   | 1.30                    | (0.87-1.96)        | 0.200            | <b>1.72</b>                      | <b>(1.04-2.86)</b> | <b>0.034</b>     | <b>1.95</b>                        | <b>(1.15-3.32)</b> | <b>0.013</b>     | 1.31                 | (0.90-1.91)        | 0.160            | <b>2.77</b>                    | <b>(1.30-5.89)</b>  | <b>0.008</b>     |

ble 3. Independent factors associated with mental health outcomes in multivariable generalized estimating equations for logistic regression models (n = 517)

|                                                                    |                         |                                |                             |                         |                                                        |                             |             |                               |                         |      |                 |           |             |                               |                         |
|--------------------------------------------------------------------|-------------------------|--------------------------------|-----------------------------|-------------------------|--------------------------------------------------------|-----------------------------|-------------|-------------------------------|-------------------------|------|-----------------|-----------|-------------|-------------------------------|-------------------------|
| Exposure to COVID-19                                               |                         |                                |                             |                         |                                                        |                             |             |                               |                         |      |                 |           |             |                               |                         |
| Been diagnosed with COVID-19                                       | <b>1.7</b><br><b>4</b>  | <b>(1.04-</b><br><b>2.93)</b>  | <b>0.0</b><br><b>35</b>     | 1.6<br>5                | (0.88-<br>3.11)                                        | 0.1<br>15                   | <b>1.97</b> | <b>(1.04-</b><br><b>3.74)</b> | <b>0.0</b><br><b>37</b> | 1.21 | (0.73-<br>2.01) | 0.45<br>7 | <b>3.13</b> | <b>(1.40-</b><br><b>6.99)</b> | <b>0.00</b><br><b>5</b> |
| Diagnosis of COVID-19 in family members                            | 1.2<br>3                | (0.79-<br>1.90)                | 0.3<br>57                   | 1.0<br>0                | (0.57-<br>1.77)                                        | 0.9<br>89                   | <b>1.83</b> | <b>(1.06-</b><br><b>3.18)</b> | <b>0.0</b><br><b>31</b> | 1.35 | (0.90-<br>2.03) | 0.14<br>5 | 1.19        | (0.53-<br>2.66)               | 0.67<br>3               |
| Diagnosis of COVID-19 in colleague                                 | 2.0<br>8                | (0.85-<br>5.06)                | 0.1<br>07                   | 3.3<br>0                | (0.78-<br>14.00)                                       | 0.1<br>05                   | 1.83        | (0.55-<br>6.10)               | 0.3<br>27               | 1.80 | (0.84-<br>3.86) | 0.13<br>1 | *           | *                             | *                       |
| Attending COVID-19 patients                                        | 1.3<br>7                | (0.87-<br>2.16)                | 0.1<br>79                   | 1.1<br>8                | (0.67-<br>2.10)                                        | 0.5<br>61                   | 0.70        | (0.40-<br>1.22)               | 0.2<br>10               | 1.23 | (0.81-<br>1.87) | 0.32<br>5 | 1.08        | (0.47-<br>2.50)               | 0.84<br>4               |
| How difficult have these problems made it for you to do your work? |                         |                                |                             |                         |                                                        |                             |             |                               |                         |      |                 |           |             |                               |                         |
| Not difficult at all                                               | Ref<br>.                | -                              | -                           | Ref<br>.                | -                                                      | -                           | -           | -                             | -                       | -    | -               | -         | -           | -                             | -                       |
| Somewhat difficult                                                 | <b>3.8</b><br><b>5</b>  | <b>(2.44-</b><br><b>6.08)</b>  | <b>&lt;0.00</b><br><b>1</b> | <b>6.6</b><br><b>0</b>  | <b>(3.14-</b><br><b>13.89)</b>                         | <b>&lt;0.00</b><br><b>1</b> | -           | -                             | -                       | -    | -               | -         | -           | -                             | -                       |
| Very / extremely difficult                                         | <b>22.</b><br><b>28</b> | <b>(8.85-</b><br><b>56.08)</b> | <b>&lt;0.00</b><br><b>1</b> | <b>53.</b><br><b>41</b> | <b>(19.37</b><br><b>-</b><br><b>147.24</b><br><b>)</b> | <b>&lt;0.00</b><br><b>1</b> | -           | -                             | -                       | -    | -               | -         | -           | -                             | -                       |

\*No one has answered the question with this outcome

<sup>1</sup>At least 10 points on the PHQ-9 questionnaire

<sup>2</sup>At least 10 points on the GAD-7 questionnaire

<sup>3</sup>At least 26 points on the IES-R questionnaire

| Factor                                    | Depression <sup>1</sup> |                    |              | Generalized anxiety <sup>2</sup> |                    |                  | Posttraumatic stress <sup>3</sup> |                     |                  | At least one outcome |                    |                  | Presence of all three outcomes |                     |              |
|-------------------------------------------|-------------------------|--------------------|--------------|----------------------------------|--------------------|------------------|-----------------------------------|---------------------|------------------|----------------------|--------------------|------------------|--------------------------------|---------------------|--------------|
|                                           | OR                      | CI 95%             | P            | OR                               | CI 95%             | P                | OR                                | CI 95%              | p                | OR                   | CI 95%             | p                | OR                             | CI 95%              | p            |
| Gender                                    |                         |                    |              |                                  |                    |                  |                                   |                     |                  |                      |                    |                  |                                |                     |              |
| Male                                      | Ref.                    | -                  | -            | Ref.                             | -                  | -                | Ref.                              | -                   | -                | Ref.                 | -                  | -                | Ref.                           | -                   | -            |
| Female                                    | <b>1.64</b>             | <b>(1.03-2.61)</b> | <b>0.035</b> | <b>2.62</b>                      | <b>(1.30-5.28)</b> | <b>0.007</b>     | <b>3.70</b>                       | <b>(1.77-7.71)</b>  | <b>&lt;0.001</b> | <b>1.89</b>          | <b>(1.24-2.88)</b> | <b>0.003</b>     | <b>3.84</b>                    | <b>(1.29-11.50)</b> | <b>0.016</b> |
| Marital status                            |                         |                    |              |                                  |                    |                  |                                   |                     |                  |                      |                    |                  |                                |                     |              |
| Unmarried or divorce                      | Ref.                    | -                  | -            | -                                | -                  | -                | -                                 | -                   | -                | Ref.                 | -                  | -                | -                              | -                   | -            |
| Married                                   | <b>1.73</b>             | <b>(1.03-2.91)</b> | <b>0.039</b> | -                                | -                  | -                | -                                 | -                   | -                | <b>1.66</b>          | <b>(1.03-2.68)</b> | <b>0.039</b>     | -                              | -                   | -            |
| Work in occupation                        |                         |                    |              |                                  |                    |                  |                                   |                     |                  |                      |                    |                  |                                |                     |              |
| Intern physician                          | -                       | -                  | -            | -                                | -                  | -                | Ref.                              | -                   | -                | Ref.                 | -                  | -                | -                              | -                   | -            |
| Medical specialties (resident)            | -                       | -                  | -            | -                                | -                  | -                | 0.61                              | (0.30-1.22)         | 0.164            | 0.62                 | (0.38-1.01)        | 0.055            | -                              | -                   | -            |
| Surgical specialties (resident)           | -                       | -                  | -            | -                                | -                  | -                | <b>0.20</b>                       | <b>(0.06-0.63)</b>  | <b>0.006</b>     | <b>0.46</b>          | <b>(0.26-0.83)</b> | <b>0.010</b>     | -                              | -                   | -            |
| Diagnostic support specialties (resident) | -                       | -                  | -            | -                                | -                  | -                | 0.58                              | (0.07-4.71)         | 0.614            | 0.60                 | (0.18-1.95)        | 0.395            | -                              | -                   | -            |
| Workground information                    |                         |                    |              |                                  |                    |                  |                                   |                     |                  |                      |                    |                  |                                |                     |              |
| Smoking                                   | -                       | -                  | -            | -                                | -                  | -                | <b>6.12</b>                       | <b>(2.71-13.81)</b> | <b>&lt;0.001</b> | <b>2.19</b>          | <b>(1.13-4.23)</b> | <b>0.020</b>     | -                              | -                   | -            |
| Psychological trauma                      | <b>1.98</b>             | <b>(1.10-3.55)</b> | <b>0.022</b> | <b>2.61</b>                      | <b>(1.29-5.27)</b> | <b>0.007</b>     | <b>2.12</b>                       | <b>(1.06-4.26)</b>  | <b>0.034</b>     | -                    | -                  | -                | <b>4.01</b>                    | <b>(1.75-9.16)</b>  | <b>0.001</b> |
| Psychiatric pathology                     | -                       | -                  | -            | <b>3.21</b>                      | <b>(1.71-6.03)</b> | <b>&lt;0.001</b> | <b>2.03</b>                       | <b>(1.07-3.84)</b>  | <b>0.030</b>     | <b>2.46</b>          | <b>(1.51-4.02)</b> | <b>&lt;0.001</b> | <b>2.98</b>                    | <b>(1.33-6.80)</b>  | <b>0.008</b> |
| Exposure to COVID-19                      |                         |                    |              |                                  |                    |                  |                                   |                     |                  |                      |                    |                  |                                |                     |              |
| Been diagnosed with COVID-19              |                         |                    |              |                                  |                    |                  |                                   |                     |                  |                      |                    |                  | <b>2.48</b>                    | <b>(1.05-5.83)</b>  | <b>0.037</b> |



|                                                                    |       |              |        |       |               |        |      |             |       |   |   |   |   |   |   |
|--------------------------------------------------------------------|-------|--------------|--------|-------|---------------|--------|------|-------------|-------|---|---|---|---|---|---|
| Diagnosis of COVID-19 in family members                            | -     | -            | -      | -     | -             | -      | 1.92 | (1.06-3.48) | 0.031 | - | - | - | - | - | - |
| How difficult have these problems made it for you to do your work? |       |              |        |       |               |        |      |             |       |   |   |   |   |   |   |
| Not difficult at all                                               | Ref.  | -            | -      | Ref.  | -             | -      | -    | -           | -     | - | - | - | - | - | - |
| Somewhat difficult                                                 | 3.86  | (2.42-6.16)  | <0.001 | 5.48  | (2.56-11.73)  | <0.001 | -    | -           | -     | - | - | - | - | - | - |
| Very / extremely difficult                                         | 21.86 | (8.54-55.96) | <0.001 | 30.53 | (10.52-88.55) | <0.001 | -    | -           | -     | - | - | - | - | - | - |

least 10 points on the PHQ-9 questionnaire  
 least 10 points on the GAD-7 questionnaire  
 least 26 points on the IES-R questionnaire

Supplementary Table 1. Symptom severity of depression, generalized anxiety and posttraumatic stress (n = 517)

| <b>Severity category</b>                      | <b>No. (%)</b> |
|-----------------------------------------------|----------------|
| PHQ-9: depression symptoms                    |                |
| Normal (0-4)                                  | 187 (36.2)     |
| Mild (5-9)                                    | 199 (38.5)     |
| Moderate (10-14)                              | 87 (16.8)      |
| Severe (15-21)                                | 44 (8.5)       |
| GAD-7: generalized anxiety symptoms           |                |
| Normal (0-4)                                  | 260 (50.3)     |
| Mild (5-9)                                    | 186 (35.9)     |
| Moderate (10-14)                              | 52 (10.1)      |
| Severe (15-21)                                | 19 (3.7)       |
| IES-R: posttraumatic stress disorder symptoms |                |
| Normal (0-8)                                  | 394 (76.2)     |
| Mild (9-25)                                   | 60 (11.6)      |
| Moderate (26-43)                              | 22 (4.3)       |
| Severe (44-88)                                | 41 (7.9)       |

Abbreviations: PHQ-9, 9-item Patient Health Questionnaire; GAD-7, 7-item Generalized Anxiety Disorder; IES-R, 22-item Impact of Event Scale–Revised.

Supplementary Table 2. Scores of depression, generalized anxiety and posttraumatic stress in participants (n = 517)

| Scale                                            | Total scores, mean<br>(IC 95%) | Occupation       |                                   |                                       |                                                 |
|--------------------------------------------------|--------------------------------|------------------|-----------------------------------|---------------------------------------|-------------------------------------------------|
|                                                  |                                | Mean (IC 95%)    |                                   |                                       |                                                 |
|                                                  |                                | Intern physician | Medical specialties<br>(resident) | Surgical<br>specialties<br>(resident) | Diagnostic support<br>specialties<br>(resident) |
| PHQ-9: depression symptoms                       | 7.0 (6.5-7.4)                  | 7.7 (7.2-8.1)    | 6.3 (5.5-7.0)                     | 5.9 (4.9-6.8)                         | 6.1 (3.6-8.7)                                   |
| GAD-7: generalized anxiety symptoms              | 5.2 (4.8-5.5)                  | 5.6 (5.0-6.1)    | 4.8 (4.2-5.5)                     | 4.7 (3.8-5.6)                         | 4.6 (2.6-6.6)                                   |
| IES-R: posttraumatic stress disorder<br>symptoms | 15.0 (13.8-16.2)               | 17.5 (13.8-17.2) | 13.5 (11.3-15.7)                  | 10.1 (7.9-12.3)                       | 14.0 (7.8-20.1)                                 |

Abbreviations: PHQ-9, 9-item Patient Health Questionnaire; GAD-7, 7-item Generalized Anxiety Disorder; IES-R, 22-item Impact of Event Scale–Revised.
